# Supplementary material for: Ultrasonication-assisted synthesis of morphology-controlled gallium oxide nanoparticles for high-performance photoelectronic device applications
Source: Royal Society of Chemistry journal article supplement (doi:10.1039/d4tc04638b), 2024-12-11
Supplement: d4tc04638b1.pdf [file d4tc04638b1.pdf]

**Ultrasonication-Assisted Room-Temperature Synthesis of  
Morphology-Controlled Gallium Oxide Nanoparticles for High-  
Performance Photoelectronic Device Applications**

**Donghui Yang<sup>a</sup>, Haishuang Hu<sup>b</sup>, Yizhou Ni<sup>c</sup>, Shiwei Chen<sup>a</sup>, Chao Wu<sup>a\*</sup>, Kai  
Chen<sup>a</sup>, Fengmin Wu<sup>a</sup>, Shunli Wang<sup>a</sup> and Daoyou Guo<sup>a\*</sup>**

*AUTHOR ADDRESS*

*<sup>a</sup>Zhejiang Key Laboratory of Quantum State Control and Optical Field Manipulation  
& Department of Physics, Zhejiang Sci-Tech University, 310018 Hangzhou, China.*

*<sup>b</sup>School of Mathematics Information, Shaoxing University, Shaoxing 312000, China.*

*<sup>c</sup>Beyond UV (Hangzhou) Incorporated, Hangzhou 310018, China.*

*Corresponding Author: Chao Wu **E-mail:** [chaowu@zstu.edu.cn](mailto:chaowu@zstu.edu.cn); Daoyou Guo **E-mail:**  
[dyguo@zstu.edu.cn](mailto:dyguo@zstu.edu.cn)*

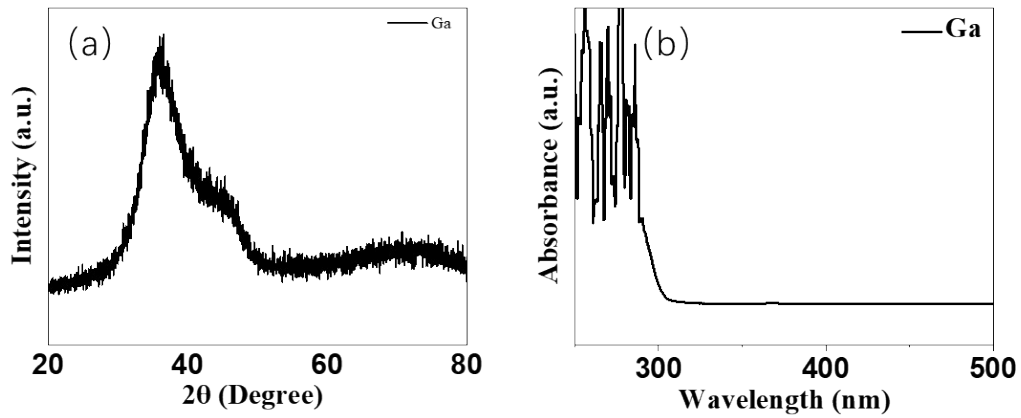

Figure S1 (a) XRD patterns and (b) Absorption edge of the Ga nanospheres.

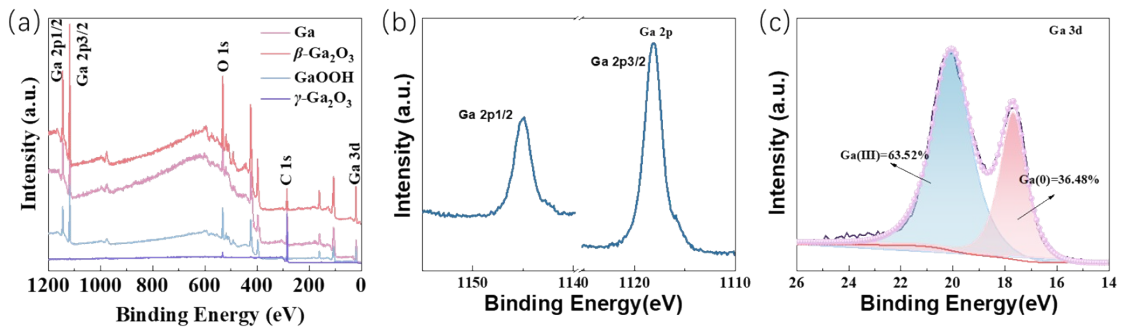

Figure S2 (a) The typical XPS survey spectrum of all the samples. XPS spectra of fabricated Ga nanospheres (b) Ga 2p, (c) Ga 3d.

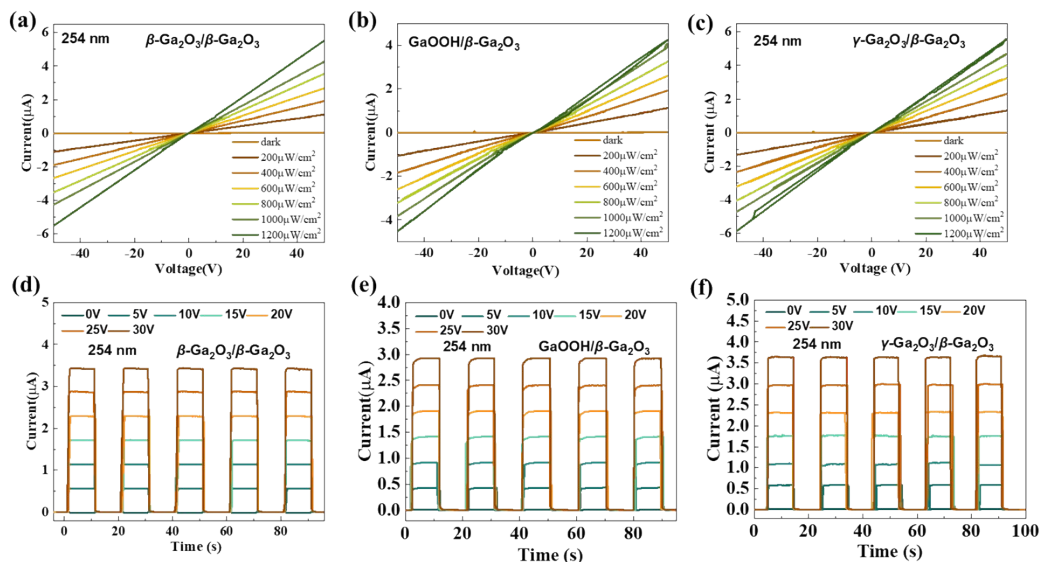

Figure S3 The  $I$ - $V$  curves of the fabricated devices under different light power intensities (a)  $\beta$ - $\text{Ga}_2\text{O}_3$  nanospheres/ $\beta$ - $\text{Ga}_2\text{O}_3$  thin films, (b) GaOOH nanorods/ $\beta$ - $\text{Ga}_2\text{O}_3$  thin films, and (c)  $\gamma$ - $\text{Ga}_2\text{O}_3$  nanospheres/ $\beta$ - $\text{Ga}_2\text{O}_3$  thin films. The  $I$ - $t$  curves

of the fabricated under different voltages (d)  $\beta$ -Ga<sub>2</sub>O<sub>3</sub> nanospheres/ $\beta$ -Ga<sub>2</sub>O<sub>3</sub> thin films, (e) GaOOH nanorods/ $\beta$ -Ga<sub>2</sub>O<sub>3</sub> thin films, and (f)  $\gamma$ -Ga<sub>2</sub>O<sub>3</sub> nanospheres/ $\beta$ -Ga<sub>2</sub>O<sub>3</sub> thin films.

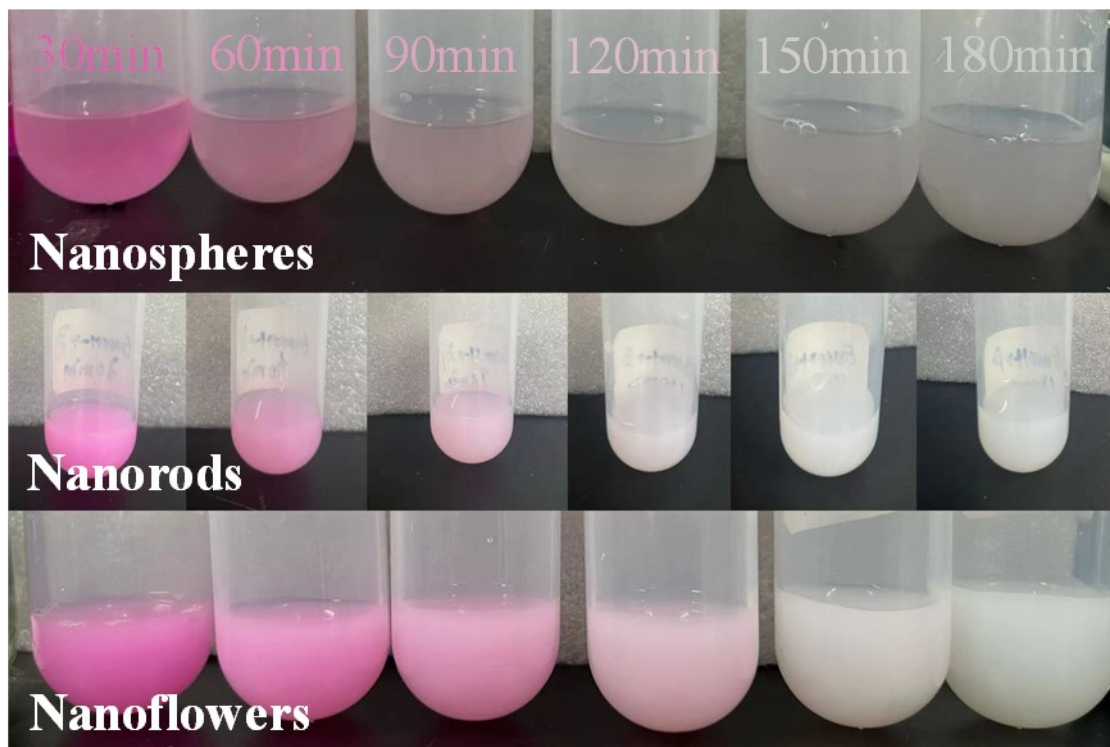

Figure S4 Time-dependent photocatalytic process.

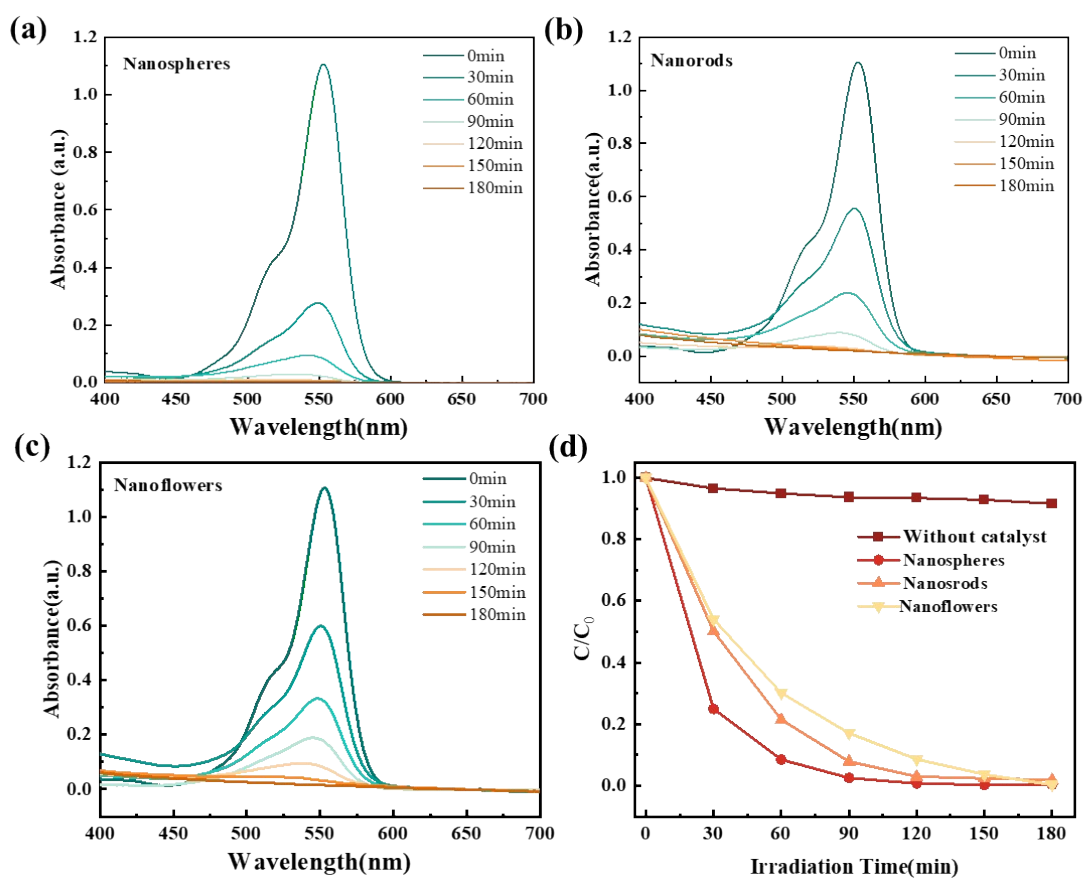

**Figure S5 Absorbance spectra of RhB solutions under different UV irradiation times with  $\beta$ -Ga<sub>2</sub>O<sub>3</sub> (a) nanospheres, (b) nanorods, and (c) nanoflowers.**

**Table S1 The adsorption energy calculated by VASP.**

|                  | $E_{\text{tot}}$ (eV) | $E_{\text{sur}}$ (eV) | $E_0$ (eV) |
|------------------|-----------------------|-----------------------|------------|
| H <sub>2</sub> O | -386.096              | -371.333              | -14.2173   |
| EDA              | -436.318              | -371.333              | -64.0895   |
| Oleylamine       | -682.17               | -371.333              | -308.657   |

**Table S2 Specific preparation methods for nanospheres, nanorods, and nanoflowers.**

| Preparation condition                                     | Pecursor solution    | Morphology  | Crystalline phase                                                          |
|-----------------------------------------------------------|----------------------|-------------|----------------------------------------------------------------------------|
| Ultrasonic time :<br>120min<br>Ultrasonic power :<br>300W | H <sub>2</sub> O     | nanorods    | GaOOH                                                                      |
|                                                           | Oleylamine           | nanospheres | Ga (Annealing at 700°C to obtain $\beta$ -Ga <sub>2</sub> O <sub>3</sub> ) |
|                                                           | H <sub>2</sub> O/EDA | nanoflowers | $\gamma$ -Ga <sub>2</sub> O <sub>3</sub>                                   |
